# Supplementary material
Source: PubMed Central journal article supplement (PMC6672035)
Supplement: 10.1194_M090845_jlr.M090845-1.pdf [file 10.1194_M090845_jlr.M090845-1.pdf]

**Supplemental Table S1**

Quadriceps sphingolipid species in wild type (WT) and dysferlin-deficient (BLAJ) mice, presented as absolute units relative to protein mass. Ceramide (Cer), monohexosylceramide (Hex1Cer), dihexosylceramide (Hex2Cer), trihexosylceramide (Hex3Cer), GM3 ganglioside (GM3), sphingomyelin (SM). N = 12 WT, N = 8 BLAJ. Data are mean +/- SEM. \*P < 0.05 as assessed by two-tailed unpaired t-test.

| Sphingolipids |                       | WT              |       | BLAJ            |       | P value | P < 0.05 |
|---------------|-----------------------|-----------------|-------|-----------------|-------|---------|----------|
|               | Species               | pmol/mg protein |       | pmol/mg protein |       |         |          |
| Cer           | d18:0/18:0            | 5.1 ±           | 1.0   | 10.1 ±          | 2.2   | 0.0287  | *        |
| Cer           | d18:0/20:0            | 4.6 ±           | 1.6   | 6.2 ±           | 2.5   | 0.5589  |          |
| Cer           | d18:0/22:0            | 2.9 ±           | 0.9   | 4.0 ±           | 0.8   | 0.4068  |          |
| Cer           | d18:0/24:0            | 3.1 ±           | 1.3   | 3.8 ±           | 0.7   | 0.6867  |          |
| Cer           | d18:0/24:1            | 3.5 ±           | 0.5   | 9.5 ±           | 2.3   | 0.0059  | *        |
| Cer           | d18:1/16:0            | 20.1 ±          | 2.2   | 88.3 ±          | 18.7  | 0.0003  | *        |
| Cer           | d18:1/18:0            | 371.0 ±         | 31.5  | 292.0 ±         | 20.4  | 0.0778  |          |
| Cer           | d18:1/20:0            | 10.9 ±          | 1.0   | 14.7 ±          | 1.6   | 0.0435  | *        |
| Cer           | d18:1/22:0            | 61.3 ±          | 5.9   | 84.1 ±          | 14.3  | 0.1101  |          |
| Cer           | d18:1/24:0            | 74.4 ±          | 7.8   | 126.3 ±         | 23.7  | 0.0260  | *        |
| Cer           | d18:1/24:1            | 129.3 ±         | 14.0  | 278.2 ±         | 44.4  | 0.0015  | *        |
| Hex1Cer       | d18:1/16:0            | 8.0 ±           | 1.5   | 98.0 ±          | 22.2  | 0.0001  | *        |
| Hex1Cer       | d18:1/18:0            | 19.0 ±          | 3.1   | 64.2 ±          | 35.0  | 0.1287  |          |
| Hex1Cer       | d18:1/20:0            | 25.7 ±          | 3.7   | 64.8 ±          | 34.0  | 0.1763  |          |
| Hex1Cer       | d18:1/22:0            | 30.2 ±          | 4.6   | 118.4 ±         | 53.6  | 0.0579  |          |
| Hex1Cer       | d18:1/24:0            | 413.3 ±         | 72.1  | 1193.7 ±        | 664.4 | 0.1673  |          |
| Hex1Cer       | d18:1/24:1            | 72.1 ±          | 11.4  | 229.1 ±         | 105.6 | 0.0851  |          |
| Hex2Cer       | d18:1/16:0            | 6.8 ±           | 3.8   | 33.7 ±          | 7.5   | 0.0024  | *        |
| Hex2Cer       | d18:1/18:0            | 35.2 ±          | 3.3   | 66.3 ±          | 12.4  | 0.0100  | *        |
| Hex2Cer       | d18:1/20:0            | 1.2 ±           | 0.2   | 3.7 ±           | 1.0   | 0.0076  | *        |
| Hex2Cer       | d18:1/22:0            | 4.7 ±           | 0.8   | 24.6 ±          | 7.0   | 0.0028  | *        |
| Hex2Cer       | d18:1/24:0            | 10.0 ±          | 1.4   | 51.5 ±          | 12.8  | 0.0009  | *        |
| Hex2Cer       | d18:1/24:1            | 9.1 ±           | 2.7   | 42.5 ±          | 10.3  | 0.0015  | *        |
| Hex3Cer       | d18:1/16:0            | 0.7 ±           | 0.2   | 3.1 ±           | 0.5   | 0.0001  | *        |
| Hex3Cer       | d18:1/18:0            | 1.9 ±           | 0.5   | 7.1 ±           | 0.8   | 0.0000  | *        |
| Hex3Cer       | d18:1/20:0            | 2.7 ±           | 0.4   | 9.4 ±           | 5.6   | 0.1579  |          |
| Hex3Cer       | d18:1/22:0            | 4.4 ±           | 0.6   | 12.5 ±          | 4.7   | 0.0490  | *        |
| Hex3Cer       | d18:1/24:0            | 0.6 ±           | 0.2   | 1.7 ±           | 0.5   | 0.0394  | *        |
| Hex3Cer       | d18:1/24:1            | 2.3 ±           | 0.5   | 15.6 ±          | 1.9   | 0.0000  | *        |
| GM3           | d18:1/16:0            | 2.5 ±           | 0.3   | 34.5 ±          | 8.4   | 0.0002  | *        |
| GM3           | d18:1/18:0            | 73.4 ±          | 8.0   | 90.0 ±          | 6.7   | 0.1582  |          |
| GM3           | d18:1/20:0            | 7.3 ±           | 1.1   | 13.9 ±          | 1.8   | 0.0030  | *        |
| GM3           | d18:1/22:0            | 6.7 ±           | 0.9   | 19.6 ±          | 5.0   | 0.0058  | *        |
| GM3           | d18:1/24:0            | 3.2 ±           | 0.6   | 11.4 ±          | 2.8   | 0.0029  | *        |
| GM3           | d18:1/24:1            | 9.0 ±           | 1.7   | 45.5 ±          | 11.3  | 0.0010  | *        |
| SM            | d17:1/14:0            | 0.1 ±           | 0.0   | 0.2 ±           | 0.0   | 0.1527  |          |
| SM            | d18:0/14:0            | 1.6 ±           | 0.2   | 1.5 ±           | 0.2   | 0.6465  |          |
| SM            | d18:1/14:0/d16:1/16:0 | 4.6 ±           | 0.5   | 7.7 ±           | 1.5   | 0.0291  | *        |
| SM            | d18:2/14:0            | 0.2 ±           | 0.0   | 0.3 ±           | 0.1   | 0.1296  |          |
| SM            | d17:1/16:0            | 14.5 ±          | 1.8   | 39.3 ±          | 7.5   | 0.0012  | *        |
| SM            | d18:0/16:0            | 42.1 ±          | 4.9   | 156.6 ±         | 29.8  | 0.0002  | *        |
| SM            | d18:1/16:0            | 472.4 ±         | 53.9  | 1563.3 ±        | 291.2 | 0.0003  | *        |
| SM            | d18:2/16:0            | 16.8 ±          | 1.8   | 62.2 ±          | 13.2  | 0.0006  | *        |
| SM            | d16:1/19:0            | 2.3 ±           | 0.2   | 4.5 ±           | 0.7   | 0.0030  | *        |
| SM            | d18:1/17:0/d17:1/18:0 | 83.5 ±          | 7.5   | 107.8 ±         | 10.9  | 0.0722  |          |
| SM            | 35:2                  | 1.1 ±           | 0.1   | 2.3 ±           | 0.4   | 0.0015  | *        |
| SM            | d18:1/18:0/d16:1/20:0 | 2016.1 ±        | 168.0 | 2235.7 ±        | 197.3 | 0.4119  |          |
| SM            | d18:2/18:0            | 66.3 ±          | 5.1   | 125.1 ±         | 17.7  | 0.0014  | *        |
| SM            | d18:2/18:1            | 1.4 ±           | 0.1   | 2.6 ±           | 0.3   | 0.0006  | *        |
| SM            | 37:2                  | 2.9 ±           | 0.3   | 4.9 ±           | 0.6   | 0.0029  | *        |
| SM            | d18:1/20:0/d16:1/22:0 | 100.3 ±         | 10.3  | 185.5 ±         | 46.8  | 0.0460  | *        |
| SM            | d18:2/20:0            | 9.6 ±           | 1.2   | 18.4 ±          | 4.0   | 0.0220  | *        |
| SM            | d16:1/23:0/d17:1/22:0 | 19.5 ±          | 2.4   | 31.8 ±          | 7.0   | 0.0692  |          |
| SM            | d18:1/23:0/d17:1/24:0 | 92.3 ±          | 10.6  | 184.6 ±         | 40.2  | 0.0165  | *        |
| SM            | d17:1/24:1            | 17.7 ±          | 2.1   | 39.9 ±          | 7.2   | 0.0025  | *        |

|    |            |         |      |          |       |        |   |
|----|------------|---------|------|----------|-------|--------|---|
| SM | d18:2/23:0 | 13.8 ±  | 1.9  | 28.2 ±   | 6.3   | 0.0192 | * |
| SM | d18:1/24:0 | 292.2 ± | 35.6 | 671.1 ±  | 186.2 | 0.0260 | * |
| SM | d18:1/24:1 | 432.0 ± | 45.7 | 1273.3 ± | 271.5 | 0.0015 | * |
| SM | d18:2/24:0 | 30.6 ±  | 3.5  | 83.8 ±   | 19.4  | 0.0041 | * |

**Supplemental Table S2**

Quadriceps cholesterol (COH) and cholesteryl esters (CE) in wild type (WT) and dysferlin-deficient (BLAJ) mice, presented as absolute units relative to protein mass. N = 12 WT, N = 8 BLAJ. Data are mean +/- SEM. \*P < 0.05 as assessed by two-tailed unpaired t-test.

| Cholesterols |           | WT              |         | BLAJ            |         | P value | P < 0.05 |
|--------------|-----------|-----------------|---------|-----------------|---------|---------|----------|
| Species      |           | pmol/mg protein |         | pmol/mg protein |         |         |          |
| COH          |           | 10735.88 ±      | 1256.32 | 19348.93 ±      | 3076.00 | 0.0086  | *        |
| CE           | 14:0      | n.d. ±          |         | n.d. ±          |         |         |          |
| CE           | 15:0      | n.d. ±          |         | 3.93 ±          | 3.93    | 0.2301  |          |
| CE           | 16:0      | 9.27 ±          | 9.27    | 48.05 ±         | 22.09   | 0.0834  |          |
| CE           | 16:1      | n.d. ±          |         | n.d. ±          |         |         |          |
| CE           | 16:2      | 0.02 ±          | 0.02    | 0.53 ±          | 0.37    | 0.1080  |          |
| CE           | 17:0      | 0.00 ±          |         | 0.41 ±          | 0.41    | 0.2301  |          |
| CE           | 17:1      | 0.12 ±          | 0.12    | 1.16 ±          | 0.89    | 0.1744  |          |
| CE           | 18:0      | 0.23 ±          | 0.16    | 13.69 ±         | 3.39    | 0.0001  | *        |
| CE           | 18:1      | 73.09 ±         | 40.39   | 342.11 ±        | 57.82   | 0.0010  | *        |
| CE           | 18:2      | 161.83 ±        | 102.43  | 408.65 ±        | 115.78  | 0.1338  |          |
| CE           | 18:3      | 2.91 ±          | 2.91    | 5.78 ±          | 3.36    | 0.5308  |          |
| CE           | 20:1      | 0.12 ±          | 0.12    | 11.51 ±         | 2.97    | 0.0002  | *        |
| CE           | 20:2      | 1.01 ±          | 0.42    | 14.83 ±         | 3.23    | 0.0001  | *        |
| CE           | 20:3      | 15.85 ±         | 3.82    | 45.71 ±         | 9.85    | 0.0046  | *        |
| CE           | 20:4      | 284.97 ±        | 45.17   | 635.04 ±        | 152.09  | 0.0180  | *        |
| CE           | 20:5      | 9.74 ±          | 5.17    | 22.50 ±         | 9.68    | 0.2216  |          |
| CE           | 22:4      | 0.05 ±          | 0.03    | 1.72 ±          | 0.37    | 0.0000  | *        |
| CE           | 22:5 (n3) | 5.14 ±          | 0.92    | 23.71 ±         | 4.27    | 0.0001  | *        |
| CE           | 22:5 (n6) | 0.21 ±          | 0.08    | 17.77 ±         | 3.18    | 0.0000  | *        |
| CE           | 24:5      | 0.01 ±          | 0.01    | 1.22 ±          | 0.27    | 0.0000  | *        |
| CE           | 24:6      | 1.66 ±          | 0.38    | 6.50 ±          | 1.66    | 0.0031  | *        |

**Supplemental Table S3**

Quadriceps diglyceride (DG) and triglyceride (TG) in wild type (WT) and dysferlin-deficient (BLAJ) mice, presented as absolute units relative to protein mass. N = 12 WT, N = 8 BLAJ. Data are mean +/- SEM. \*P < 0.05 as assessed by two-tailed unpaired t-test.

|    | Glycerolipids  | WT        |                 | BLAJ            |                 | P value | P < 0.05 |
|----|----------------|-----------|-----------------|-----------------|-----------------|---------|----------|
|    |                | Species   | pmol/mg protein | pmol/mg protein | pmol/mg protein |         |          |
| DG | 14:0_16:0 (a)  | 88.49 ±   | 9.77            | 57.10 ±         | 5.20            | 0.0244  | *        |
| DG | 14:0_16:0 (b)  | 5.28 ±    | 1.40            | 6.01 ±          | 1.56            | 0.7354  |          |
| DG | 14:0_18:1 (a)  | 72.98 ±   | 9.69            | 106.08 ±        | 24.36           | 0.1670  |          |
| DG | 14:0_18:1 (b)  | 8.91 ±    | 1.36            | 19.03 ±         | 4.93            | 0.0304  | *        |
| DG | 14:0_18:2 (a)  | 26.00 ±   | 3.88            | 47.94 ±         | 14.94           | 0.1075  |          |
| DG | 14:0_18:2 (b)  | 3.41 ±    | 0.67            | 10.28 ±         | 3.17            | 0.0199  | *        |
| DG | 16:0_16:0 (a)  | 849.46 ±  | 66.45           | 679.40 ±        | 46.48           | 0.0758  |          |
| DG | 16:0_16:0 (b)  | 195.90 ±  | 18.76           | 213.67 ±        | 24.22           | 0.5647  |          |
| DG | 16:0_18:0      | 408.21 ±  | 75.50           | 589.10 ±        | 89.68           | 0.1426  |          |
| DG | 16:0_18:1 (a)  | 2196.40 ± | 273.12          | 3601.71 ±       | 743.57          | 0.0558  |          |
| DG | 16:0_18:1 (b)  | 645.25 ±  | 95.15           | 1092.82 ±       | 238.14          | 0.0620  |          |
| DG | 16:0_18:2 (a)  | 845.34 ±  | 128.09          | 1672.82 ±       | 406.77          | 0.0354  | *        |
| DG | 16:0_18:2 (b)  | 159.31 ±  | 29.88           | 404.75 ±        | 119.25          | 0.0282  | *        |
| DG | 16:0_20:4 (a)  | 81.75 ±   | 7.19            | 134.11 ±        | 16.03           | 0.0036  | *        |
| DG | 16:0_20:4 (b)  | 26.67 ±   | 1.91            | 55.81 ±         | 9.45            | 0.0018  | *        |
| DG | 16:0_22:5 (a)  | 76.51 ±   | 7.76            | 75.45 ±         | 8.43            | 0.9293  |          |
| DG | 16:0_22:5 (b)  | 20.42 ±   | 1.87            | 27.93 ±         | 3.36            | 0.0490  | *        |
| DG | 16:0_22:6      | 273.95 ±  | 24.87           | 329.98 ±        | 29.77           | 0.1678  |          |
| DG | 16:1_18:1 (a)  | 530.41 ±  | 86.28           | 644.53 ±        | 191.02          | 0.5496  |          |
| DG | 16:1_18:1 (b)  | 93.54 ±   | 17.87           | 136.26 ±        | 43.04           | 0.3123  |          |
| DG | 18:0_18:0      | 443.96 ±  | 125.81          | 485.19 ±        | 111.17          | 0.8208  |          |
| DG | 18:0_18:1      | 372.03 ±  | 56.73           | 1067.75 ±       | 294.16          | 0.0114  | *        |
| DG | 18:0_18:2      | 317.45 ±  | 48.72           | 1067.36 ±       | 309.21          | 0.0090  | *        |
| DG | 18:0_20:4      | 621.12 ±  | 74.95           | 1251.40 ±       | 146.32          | 0.0005  | *        |
| DG | 18:0_22:6      | 7.62 ±    | 1.89            | 13.33 ±         | 8.06            | 0.4187  |          |
| DG | 18:1_18:1      | 3156.21 ± | 514.54          | 7065.10 ±       | 2051.69         | 0.0404  | *        |
| DG | 18:1_18:2 (a)  | 1300.35 ± | 222.45          | 3275.82 ±       | 1013.47         | 0.0340  | *        |
| DG | 18:1_18:2 (b)  | 240.74 ±  | 42.92           | 758.70 ±        | 261.61          | 0.0283  | *        |
| DG | 18:1_18:3 (a)  | 150.22 ±  | 28.93           | 305.77 ±        | 90.64           | 0.0717  |          |
| DG | 18:1_18:3 (b)  | 33.41 ±   | 6.60            | 91.84 ±         | 30.52           | 0.0367  | *        |
| DG | 18:1_20:3 (a)  | 15.94 ±   | 2.07            | 29.51 ±         | 6.22            | 0.0267  | *        |
| DG | 18:1_20:3 (b)  | 20.46 ±   | 3.00            | 45.21 ±         | 10.41           | 0.0146  | *        |
| DG | 18:1_20:4 (a)  | 59.23 ±   | 7.11            | 121.95 ±        | 24.85           | 0.0102  | *        |
| DG | 18:1_20:4 (b)  | 20.56 ±   | 2.39            | 59.37 ±         | 12.03           | 0.0012  | *        |
| DG | 18:1_22:5 (a)  | 6.15 ±    | 0.63            | 13.88 ±         | 2.26            | 0.0010  | *        |
| DG | 18:1_22:5 (b)  | 5.96 ±    | 0.83            | 14.42 ±         | 1.92            | 0.0002  | *        |
| DG | 18:2_18:2 (a)  | 266.28 ±  | 48.47           | 768.89 ±        | 242.63          | 0.0242  | *        |
| DG | 18:2_18:2 (b)  | 53.82 ±   | 10.33           | 155.24 ±        | 49.33           | 0.0257  | *        |
| TG | 14:0_16:0_18:2 | 3386.68 ± | 337.74          | 2107.25 ±       | 333.52          | 0.0229  | *        |
| TG | 14:0_16:1_18:1 | 1818.32 ± | 191.18          | 1266.65 ±       | 208.29          | 0.0840  |          |
| TG | 14:0_16:1_18:2 | 991.94 ±  | 139.82          | 766.16 ±        | 154.05          | 0.3217  |          |
| TG | 14:0_18:0_18:1 | 48.16 ±   | 5.36            | 66.17 ±         | 13.12           | 0.2001  |          |
| TG | 14:0_18:2_18:2 | 603.98 ±  | 95.85           | 694.90 ±        | 146.02          | 0.6136  |          |
| TG | 14:1_16:0_18:1 | 399.55 ±  | 37.99           | 261.37 ±        | 43.83           | 0.0370  | *        |
| TG | 14:1_16:1_18:0 | 5856.52 ± | 536.53          | 2809.37 ±       | 549.67          | 0.0017  | *        |
| TG | 14:1_18:0_18:2 | 160.55 ±  | 16.43           | 127.56 ±        | 20.24           | 0.2422  |          |
| TG | 14:1_18:1_18:1 | 2093.88 ± | 205.08          | 1554.47 ±       | 218.77          | 0.1101  |          |
| TG | 15:0_16:0_18:1 | 128.20 ±  | 9.25            | 146.18 ±        | 16.29           | 0.3466  |          |
| TG | 15:0_18:1_18:1 | 94.80 ±   | 8.97            | 111.93 ±        | 16.99           | 0.3766  |          |
| TG | 16:0_16:0_16:0 | 758.55 ±  | 78.48           | 678.55 ±        | 92.64           | 0.5396  |          |
| TG | 16:0_16:0_18:0 | 282.20 ±  | 44.71           | 341.98 ±        | 60.74           | 0.4519  |          |
| TG | 16:0_16:0_18:1 | 2474.62 ± | 222.98          | 2548.56 ±       | 330.45          | 0.8574  |          |
| TG | 16:0_16:0_18:2 | 1693.79 ± | 147.91          | 2129.06 ±       | 312.09          | 0.2104  |          |
| TG | 16:0_16:1_18:1 | 4711.24 ± | 390.21          | 3583.84 ±       | 455.10          | 0.0917  |          |
| TG | 16:0_18:0_18:1 | 1054.59 ± | 197.57          | 1671.28 ±       | 397.12          | 0.1714  |          |
| TG | 16:0_18:1_18:1 | 6111.27 ± | 574.88          | 6665.22 ±       | 934.69          | 0.6210  |          |
| TG | 16:0_18:1_18:2 | 4535.46 ± | 400.27          | 5423.33 ±       | 759.64          | 0.3067  |          |
| TG | 16:0_18:2_18:2 | 2692.48 ± | 302.25          | 3132.56 ±       | 505.93          | 0.4646  |          |
| TG | 16:1_16:1_16:1 | 1559.31 ± | 211.85          | 633.50 ±        | 142.60          | 0.0052  | *        |
| TG | 16:1_16:1_18:0 | 184.25 ±  | 13.68           | 173.32 ±        | 28.47           | 0.7262  |          |
| TG | 16:1_16:1_18:1 | 3327.32 ± | 354.78          | 2104.52 ±       | 339.35          | 0.0344  | *        |
| TG | 16:1_18:1_18:1 | 2904.64 ± | 259.19          | 2168.96 ±       | 260.49          | 0.0803  |          |
| TG | 16:1_18:1_18:2 | 6061.11 ± | 550.55          | 5318.97 ±       | 665.53          | 0.4237  |          |
| TG | 16:0_16:1_17:0 | 307.96 ±  | 24.68           | 280.98 ±        | 30.77           | 0.5208  |          |
| TG | 14:0_17:0_18:1 | 134.22 ±  | 9.97            | 145.03 ±        | 14.40           | 0.5529  |          |
| TG | 16:0_17:0_18:1 | 120.14 ±  | 15.58           | 160.03 ±        | 26.71           | 0.2118  |          |
| TG | 16:1_17:0_18:1 | 560.92 ±  | 50.96           | 535.40 ±        | 71.02           | 0.7793  |          |

|    |                |           |        |           |         |        |
|----|----------------|-----------|--------|-----------|---------|--------|
| TG | 17:0_18:1_18:1 | 382.99 ±  | 57.93  | 569.07 ±  | 123.57  | 0.1766 |
| TG | 16:0_17:0_18:2 | 515.18 ±  | 53.99  | 543.63 ±  | 81.11   | 0.7769 |
| TG | 18:0_18:0_18:1 | 65.88 ±   | 15.88  | 189.50 ±  | 65.64   | 0.0625 |
| TG | 18:0_18:1_18:1 | 1219.96 ± | 233.70 | 2274.66 ± | 582.71  | 0.0951 |
| TG | 18:0_18:2_18:2 | 2716.84 ± | 276.94 | 3481.14 ± | 508.63  | 0.1979 |
| TG | 14:0_16:0_18:1 | 903.29 ±  | 75.12  | 877.27 ±  | 127.64  | 0.8621 |
| TG | 18:1_18:1_18:1 | 2783.93 ± | 261.29 | 3530.68 ± | 545.73  | 0.2202 |
| TG | 18:1_18:1_18:2 | 5885.17 ± | 500.39 | 7528.91 ± | 1030.62 | 0.1577 |
| TG | 18:1_18:1_20:4 | 256.27 ±  | 17.22  | 316.68 ±  | 36.33   | 0.1389 |
| TG | 18:1_18:1_22:6 | 222.29 ±  | 18.08  | 272.78 ±  | 32.02   | 0.1831 |
| TG | 18:1_18:2_18:2 | 4017.12 ± | 443.29 | 5135.35 ± | 811.81  | 0.2366 |
| TG | 18:2_18:2_18:2 | 825.35 ±  | 123.71 | 1184.97 ± | 231.04  | 0.1805 |
| TG | 18:2_18:2_20:4 | 135.13 ±  | 15.87  | 182.30 ±  | 29.39   | 0.1692 |

**Supplemental Table S4**

Quadriceps phospholipid species in wild type (WT) and dysferlin-deficient (BLAJ) mice, presented as absolute units relative to protein mass. Phosphatidylcholine (PC), alkylphosphatidylcholine (PC(O)), alkenylphosphatidylcholine (PC(P)), lysophosphatidylcholine (LPC), lysoalkylphosphatidylcholine (LPC(O)), lysoalkenylphosphatidylcholine (LPC(P)), phosphatidylethanolamine (PE), alkylphosphatidylethanolamine (PE(O)), alkenylphosphatidylethanolamine (PE(P)), lysophosphatidylethanolamine (LPE), lysoalkenylphosphatidylethanolamine (LPE(P)), phosphatidylinositol (PI), lysophosphatidylinositol (LPI), and phosphatidylserine (PS). N = 12 WT, N = 8 BLAJ. Data are mean +/- SEM. \*P < 0.05 as assessed by two-tailed unpaired t-test.

|    | Phospholipids  | WT         |                 | BLAJ            |                 | P value | P < 0.05 |
|----|----------------|------------|-----------------|-----------------|-----------------|---------|----------|
|    |                | Species    | pmol/mg protein | pmol/mg protein | pmol/mg protein |         |          |
| PC | 14:0_16:0      | 587.64 ±   | 49.43           | 496.23 ±        | 36.65           | 0.1946  |          |
| PC | 14:0_20:4      | 256.52 ±   | 20.72           | 181.87 ±        | 14.76           | 0.0165  | *        |
| PC | 14:0_22:6      | 292.75 ±   | 23.61           | 172.50 ±        | 15.82           | 0.0014  | *        |
| PC | 15-MHDA_18:1   | 48.35 ±    | 5.06            | 70.48 ±         | 7.54            | 0.0205  | *        |
| PC | 15-MHDA_18:2   | 145.64 ±   | 16.15           | 192.45 ±        | 21.30           | 0.0922  |          |
| PC | 15-MHDA_20:4   | 107.34 ±   | 11.24           | 101.92 ±        | 8.26            | 0.7293  |          |
| PC | 15-MHDA_22:6   | 101.79 ±   | 9.88            | 77.73 ±         | 6.44            | 0.0867  |          |
| PC | 15:0_20:3      | 46.14 ±    | 4.73            | 51.18 ±         | 3.36            | 0.4444  |          |
| PC | 15:0_20:4      | 86.78 ±    | 8.86            | 84.41 ±         | 5.78            | 0.8443  |          |
| PC | 15:0_22:6      | 129.15 ±   | 12.42           | 107.03 ±        | 8.11            | 0.2013  |          |
| PC | 16:0_16:0      | 2158.11 ±  | 159.81          | 3012.60 ±       | 327.40          | 0.0183  | *        |
| PC | 16:0_18:0      | 182.53 ±   | 16.89           | 424.23 ±        | 70.55           | 0.0009  | *        |
| PC | 16:0_18:1      | 9587.11 ±  | 939.80          | 15766.21 ±      | 1757.59         | 0.0034  | *        |
| PC | 16:0_18:2      | 11352.05 ± | 1160.89         | 14585.15 ±      | 1104.92         | 0.0715  |          |
| PC | 16:0_18:3 (a)  | 998.19 ±   | 72.03           | 959.91 ±        | 61.03           | 0.7110  |          |
| PC | 16:0_18:3 (b)  | 127.70 ±   | 11.86           | 134.27 ±        | 8.95            | 0.6925  |          |
| PC | 16:0_20:3 (a)  | 1708.97 ±  | 139.37          | 1749.25 ±       | 125.55          | 0.8424  |          |
| PC | 16:0_20:3 (b)  | 209.76 ±   | 16.66           | 220.56 ±        | 18.28           | 0.6748  |          |
| PC | 16:0_20:4      | 182.56 ±   | 17.85           | 235.44 ±        | 28.69           | 0.1151  |          |
| PC | 16:0_20:5      | 292.43 ±   | 24.06           | 239.38 ±        | 19.98           | 0.1340  |          |
| PC | 16:0_22:6      | 8352.69 ±  | 433.54          | 7885.63 ±       | 320.98          | 0.4426  |          |
| PC | 16:1_18:2      | 416.66 ±   | 44.89           | 429.97 ±        | 39.42           | 0.8374  |          |
| PC | 16:1_20:4      | 612.17 ±   | 52.91           | 442.69 ±        | 38.77           | 0.0311  | *        |
| PC | 16:1_22:6      | 848.10 ±   | 71.41           | 553.59 ±        | 44.91           | 0.0063  | *        |
| PC | 17:0_18:1      | 193.85 ±   | 22.73           | 346.74 ±        | 48.32           | 0.0051  | *        |
| PC | 17:0_18:2      | 179.11 ±   | 22.10           | 300.74 ±        | 45.09           | 0.0154  | *        |
| PC | 17:0_20:4      | 215.32 ±   | 24.39           | 261.36 ±        | 23.10           | 0.2101  |          |
| PC | 17:0_22:6      | 189.76 ±   | 23.86           | 175.45 ±        | 20.71           | 0.6778  |          |
| PC | 17:1_18:2      | 83.25 ±    | 9.70            | 102.69 ±        | 9.78            | 0.1922  |          |
| PC | 18:0_18:1      | 692.99 ±   | 69.34           | 1884.90 ±       | 402.75          | 0.0023  | *        |
| PC | 18:0_18:2      | 2038.38 ±  | 242.00          | 4196.62 ±       | 922.12          | 0.0148  | *        |
| PC | 18:0_20:3      | 310.74 ±   | 30.77           | 491.27 ±        | 90.54           | 0.0414  | *        |
| PC | 18:0_20:4      | 2164.87 ±  | 212.03          | 3260.35 ±       | 433.43          | 0.0218  | *        |
| PC | 18:0_22:4      | 69.83 ±    | 9.14            | 215.20 ±        | 48.04           | 0.0020  | *        |
| PC | 18:0_22:5 (n3) | 434.75 ±   | 46.48           | 638.55 ±        | 130.29          | 0.1056  |          |
| PC | 18:0_22:5 (n6) | 131.67 ±   | 25.81           | 136.97 ±        | 36.53           | 0.9042  |          |
| PC | 18:0_22:6      | 1637.48 ±  | 230.65          | 1895.94 ±       | 405.51          | 0.5584  |          |
| PC | 18:1_18:1      | 1061.47 ±  | 112.31          | 2203.22 ±       | 276.27          | 0.0004  | *        |
| PC | 18:1_18:2      | 1929.91 ±  | 202.16          | 3292.03 ±       | 335.69          | 0.0016  | *        |
| PC | 18:1_20:3      | 291.38 ±   | 26.59           | 346.37 ±        | 31.22           | 0.2005  |          |
| PC | 18:1_22:6 (a)  | 1108.83 ±  | 110.16          | 1199.60 ±       | 104.97          | 0.5781  |          |
| PC | 18:1_22:6 (b)  | 160.75 ±   | 17.14           | 168.52 ±        | 26.79           | 0.8001  |          |
| PC | 18:2_18:2      | 1022.63 ±  | 108.83          | 1533.44 ±       | 186.56          | 0.0208  | *        |
| PC | 18:2_20:5      | 202.03 ±   | 17.48           | 130.73 ±        | 9.85            | 0.0062  | *        |
| PC | 20:0_20:4      | 11.44 ±    | 1.24            | 25.81 ±         | 4.59            | 0.0021  | *        |
| PC | 28:0           | 21.25 ±    | 1.77            | 15.79 ±         | 1.28            | 0.0364  | *        |
| PC | 31:0 (a)       | 146.57 ±   | 10.52           | 99.99 ±         | 7.28            | 0.0043  | *        |
| PC | 31:0 (b)       | 123.39 ±   | 11.53           | 159.78 ±        | 14.23           | 0.0621  |          |
| PC | 31:1           | 51.33 ±    | 4.75            | 44.26 ±         | 3.40            | 0.2895  |          |
| PC | 32:1           | 3419.11 ±  | 325.71          | 3094.54 ±       | 228.03          | 0.4727  |          |
| PC | 32:2           | 354.90 ±   | 33.09           | 321.21 ±        | 22.54           | 0.4612  |          |
| PC | 33:0 (a)       | 98.70 ±    | 8.19            | 94.66 ±         | 8.15            | 0.7413  |          |
| PC | 33:0 (b)       | 36.88 ±    | 3.74            | 68.37 ±         | 10.33           | 0.0039  | *        |
| PC | 33:1           | 411.64 ±   | 40.31           | 480.05 ±        | 39.46           | 0.2621  |          |
| PC | 33:2           | 131.70 ±   | 15.01           | 173.64 ±        | 16.34           | 0.0816  |          |

|     |                      |           |        |           |        |        |   |
|-----|----------------------|-----------|--------|-----------|--------|--------|---|
| PC  | 34:5                 | 5.92 ±    | 0.52   | 4.45 ±    | 0.29   | 0.0455 | * |
| PC  | 35:5                 | 1.47 ±    | 0.16   | 1.22 ±    | 0.12   | 0.2490 |   |
| PC  | 36:0                 | 2.83 ±    | 0.37   | 10.20 ±   | 5.37   | 0.1068 |   |
| PC  | 36:6 (a)             | 17.57 ±   | 1.69   | 13.92 ±   | 1.03   | 0.1227 |   |
| PC  | 38:2 (a)             | 9.72 ±    | 1.08   | 29.43 ±   | 6.40   | 0.0016 | * |
| PC  | 38:2 (b)             | 45.17 ±   | 5.45   | 115.57 ±  | 21.16  | 0.0012 | * |
| PC  | 38:2 (c)             | 11.74 ±   | 1.40   | 28.69 ±   | 5.71   | 0.0028 | * |
| PC  | 38:4 (b)             | 631.59 ±  | 56.84  | 1029.09 ± | 99.90  | 0.0016 | * |
| PC  | 38:5 (a)             | 5654.53 ± | 566.34 | 5392.02 ± | 357.49 | 0.7327 |   |
| PC  | 38:5 (b)             | 966.57 ±  | 116.79 | 735.90 ±  | 64.85  | 0.1503 |   |
| PC  | 38:6 (a)             | 1217.36 ± | 115.16 | 1382.43 ± | 99.84  | 0.3260 |   |
| PC  | 38:7(c)              | 89.48 ±   | 6.56   | 66.18 ±   | 5.70   | 0.0222 | * |
| PC  | 39:5(a)              | 33.65 ±   | 2.99   | 27.86 ±   | 2.07   | 0.1705 |   |
| PC  | 39:5(b)              | 47.82 ±   | 4.47   | 51.90 ±   | 5.28   | 0.5656 |   |
| PC  | 40:7 (a)             | 398.32 ±  | 34.51  | 328.73 ±  | 18.27  | 0.1404 |   |
| PC  | 40:8                 | 895.14 ±  | 94.04  | 889.87 ±  | 112.31 | 0.9719 |   |
| PC  | O-16:0/16:0          | 41.26 ±   | 4.66   | 149.35 ±  | 30.67  | 0.0005 | * |
| PC  | O-16:0/20:3          | 2.27 ±    | 0.26   | 12.96 ±   | 2.39   | 0.0000 | * |
| PC  | O-16:0/20:4          | 33.35 ±   | 4.31   | 185.47 ±  | 37.26  | 0.0001 | * |
| PC  | O-16:0/22:6          | 55.78 ±   | 5.67   | 60.34 ±   | 5.64   | 0.5918 |   |
| PC  | O-18:0/18:1          | 5.52 ±    | 0.59   | 15.75 ±   | 3.09   | 0.0010 | * |
| PC  | O-18:0/20:4          | 5.92 ±    | 0.74   | 40.92 ±   | 8.63   | 0.0001 | * |
| PC  | O-18:0/22:6          | 6.73 ±    | 0.69   | 8.88 ±    | 1.12   | 0.1002 |   |
| PC  | O-18:1/18:1          | 7.06 ±    | 0.82   | 32.59 ±   | 5.82   | 0.0000 | * |
| PC  | O-18:1/18:2          | 9.31 ±    | 1.11   | 49.93 ±   | 9.42   | 0.0001 | * |
| PC  | O-32:1               | 14.26 ±   | 1.38   | 25.84 ±   | 4.09   | 0.0059 | * |
| PC  | O-32:2               | 1.82 ±    | 0.21   | 2.92 ±    | 0.42   | 0.0178 | * |
| PC  | O-34:1               | 190.07 ±  | 19.75  | 502.67 ±  | 82.28  | 0.0003 | * |
| PC  | O-34:2 (a)           | 13.78 ±   | 1.37   | 23.60 ±   | 3.54   | 0.0083 | * |
| PC  | O-34:2 (b)           | 27.51 ±   | 3.11   | 103.14 ±  | 18.57  | 0.0001 | * |
| PC  | O-34:4               | 0.35 ±    | 0.05   | 1.47 ±    | 0.31   | 0.0003 | * |
| PC  | O-35:4               | 0.73 ±    | 0.08   | 2.96 ±    | 0.58   | 0.0002 | * |
| PC  | O-36:0               | 1.79 ±    | 0.22   | 4.54 ±    | 0.94   | 0.0030 | * |
| PC  | O-36:5               | 4.77 ±    | 0.51   | 13.13 ±   | 2.21   | 0.0003 | * |
| PC  | O-38:5               | 55.34 ±   | 5.43   | 271.82 ±  | 53.65  | 0.0001 | * |
| PC  | O-40:5               | 4.61 ±    | 0.48   | 14.62 ±   | 2.62   | 0.0002 | * |
| PC  | O-40:7               | 22.51 ±   | 2.84   | 87.61 ±   | 15.13  | 0.0001 | * |
| PC  | P-15:0/20:4 (a)      | 0.35 ±    | 0.06   | 0.42 ±    | 0.07   | 0.4696 |   |
| PC  | P-15:0/20:4 (b)      | 1.22 ±    | 0.16   | 1.88 ±    | 0.21   | 0.0212 | * |
| PC  | P-16:0/14:0          | 9.67 ±    | 0.84   | 7.30 ±    | 0.65   | 0.0577 |   |
| PC  | P-16:0/16:0          | 75.28 ±   | 7.77   | 87.61 ±   | 10.59  | 0.3496 |   |
| PC  | P-16:0/16:1          | 16.25 ±   | 1.42   | 14.99 ±   | 1.48   | 0.5602 |   |
| PC  | P-16:0/18:1          | 88.32 ±   | 9.87   | 122.99 ±  | 12.83  | 0.0438 | * |
| PC  | P-16:0/18:2          | 93.37 ±   | 10.25  | 110.45 ±  | 12.95  | 0.3120 |   |
| PC  | P-16:0/18:3          | 3.26 ±    | 0.36   | 3.81 ±    | 0.46   | 0.3551 |   |
| PC  | P-16:0/20:4          | 152.42 ±  | 14.85  | 252.15 ±  | 26.98  | 0.0025 | * |
| PC  | P-16:0/20:5          | 12.19 ±   | 1.30   | 18.21 ±   | 2.77   | 0.0416 | * |
| PC  | P-16:0/22:6          | 566.15 ±  | 62.57  | 575.32 ±  | 60.90  | 0.9213 |   |
| PC  | P-18:0/20:4          | 9.74 ±    | 0.93   | 17.38 ±   | 2.21   | 0.0020 | * |
| PC  | P-18:0/22:6          | 29.54 ±   | 3.49   | 30.35 ±   | 3.71   | 0.8788 |   |
| PC  | P-18:1/22:6          | 49.61 ±   | 5.61   | 65.21 ±   | 6.41   | 0.0879 |   |
| PC  | P-20:0/20:4          | 0.42 ±    | 0.04   | 0.94 ±    | 0.16   | 0.0016 | * |
| PC  | P-36:2               | 5.88 ±    | 0.71   | 7.41 ±    | 1.31   | 0.2809 |   |
| PC  | P-36:3               | 7.48 ±    | 0.79   | 12.73 ±   | 1.79   | 0.0073 | * |
| PC  | P-38:5 (a)           | 92.08 ±   | 10.43  | 177.33 ±  | 24.40  | 0.0019 | * |
| PC  | P-38:5 (b)           | 207.07 ±  | 19.70  | 224.36 ±  | 22.90  | 0.5784 |   |
| LPC | 14:0 [sn1]           | 4.11 ±    | 0.40   | 6.12 ±    | 0.71   | 0.0159 | * |
| LPC | 14:0 [sn2]           | 2.21 ±    | 0.26   | 2.48 ±    | 0.23   | 0.4826 |   |
| LPC | 15-MHDA [sn1] / 17:0 | 1.89 ±    | 0.22   | 4.80 ±    | 0.89   | 0.0012 | * |
| LPC | L15-MHDA [sn2]       | 1.82 ±    | 0.19   | 4.31 ±    | 0.84   | 0.0027 | * |
| LPC | 15:0 [sn1]           | 1.42 ±    | 0.14   | 3.33 ±    | 0.53   | 0.0006 | * |
| LPC | 15:0 [sn2]           | 0.88 ±    | 0.11   | 1.38 ±    | 0.20   | 0.0254 | * |
| LPC | 16:0 [sn1]           | 225.90 ±  | 22.15  | 553.66 ±  | 99.72  | 0.0011 | * |
| LPC | 16:0 [sn2]           | 47.26 ±   | 4.64   | 111.39 ±  | 18.97  | 0.0010 | * |
| LPC | 16:1 [sn1]           | 13.86 ±   | 1.35   | 21.98 ±   | 3.10   | 0.0145 | * |
| LPC | 16:1 [sn2]           | 6.35 ±    | 0.78   | 8.14 ±    | 1.03   | 0.1737 |   |

|     |                                   |         |   |        |         |   |        |        |   |
|-----|-----------------------------------|---------|---|--------|---------|---|--------|--------|---|
| LPC | 17:0 [sn1]                        | 3.34    | ± | 0.38   | 10.98   | ± | 2.42   | 0.0013 | * |
| LPC | L17:1 [sn2] (a)                   | 0.65    | ± | 0.08   | 0.97    | ± | 0.14   | 0.0449 | * |
| LPC | 17:1 [sn1] (a) / 17:1 [sn2] (a)   | 1.55    | ± | 0.17   | 3.00    | ± | 0.41   | 0.0016 | * |
| LPC | 17:1 [sn1] (b)                    | 0.19    | ± | 0.03   | 0.19    | ± | 0.02   | 0.8709 |   |
| LPC | 18:0 [sn1]                        | 73.93   | ± | 7.56   | 342.61  | ± | 81.24  | 0.0007 | * |
| LPC | 18:0 [sn2]                        | 10.31   | ± | 1.20   | 55.41   | ± | 13.59  | 0.0007 | * |
| LPC | 18:1 [sn1]                        | 55.36   | ± | 5.90   | 191.57  | ± | 37.56  | 0.0004 | * |
| LPC | 18:1 [sn2]                        | 35.16   | ± | 4.68   | 92.99   | ± | 17.84  | 0.0015 | * |
| LPC | 18:2 [sn1]                        | 58.92   | ± | 7.24   | 174.41  | ± | 38.03  | 0.0020 | * |
| LPC | 18:2 [sn2]                        | 48.06   | ± | 6.92   | 99.18   | ± | 19.58  | 0.0106 | * |
| LPC | 18:3 [sn1] (a)/18:3 [sn2] (a)     | 2.72    | ± | 0.28   | 4.26    | ± | 0.57   | 0.0152 | * |
| LPC | 18:3 [sn1] (b)                    | 0.17    | ± | 0.03   | 0.38    | ± | 0.08   | 0.0132 | * |
| LPC | 18:3 [sn2] (a)                    | 0.36    | ± | 0.04   | 0.62    | ± | 0.10   | 0.0093 | * |
| LPC | L20:0 [sn1]                       | 4.06    | ± | 0.53   | 16.15   | ± | 3.52   | 0.0006 | * |
| LPC | L20:0 [sn2]                       | 0.63    | ± | 0.09   | 2.68    | ± | 0.58   | 0.0005 | * |
| LPC | L20:1 [sn1]                       | 1.45    | ± | 0.16   | 6.35    | ± | 1.37   | 0.0004 | * |
| LPC | L20:1 [sn2]                       | 0.91    | ± | 0.10   | 3.00    | ± | 0.60   | 0.0006 | * |
| LPC | L20:2 [sn1]                       | 1.57    | ± | 0.19   | 4.49    | ± | 0.83   | 0.0006 | * |
| LPC | L20:2 [sn2]                       | 1.64    | ± | 0.18   | 3.25    | ± | 0.51   | 0.0031 | * |
| LPC | L20:3 [sn1]                       | 7.69    | ± | 0.89   | 13.72   | ± | 2.12   | 0.0081 | * |
| LPC | L20:3 [sn2]                       | 6.34    | ± | 0.87   | 8.15    | ± | 1.08   | 0.2084 |   |
| LPC | L20:4 [sn1]                       | 57.95   | ± | 6.72   | 108.64  | ± | 15.25  | 0.0031 | * |
| LPC | L20:4 [sn2]                       | 48.87   | ± | 6.41   | 61.87   | ± | 7.69   | 0.2127 |   |
| LPC | L20:5 [sn1]                       | 0.78    | ± | 0.08   | 1.16    | ± | 0.20   | 0.0655 |   |
| LPC | L20:5 [sn2]                       | 0.57    | ± | 0.07   | 0.58    | ± | 0.10   | 0.9449 |   |
| LPC | L22:4 [sn1]                       | 2.35    | ± | 0.30   | 8.01    | ± | 1.42   | 0.0002 | * |
| LPC | L22:4 [sn2]                       | 2.44    | ± | 0.33   | 5.12    | ± | 0.76   | 0.0019 | * |
| LPC | L22:5 [sn1] (n3)/L22:5 [sn2] (n3) | 18.43   | ± | 2.03   | 27.12   | ± | 3.62   | 0.0366 | * |
| LPC | L22:5 [sn1] (n6)                  | 4.04    | ± | 0.51   | 5.43    | ± | 0.83   | 0.1464 |   |
| LPC | L22:5 [sn2] (n3)                  | 18.66   | ± | 2.43   | 21.29   | ± | 2.42   | 0.4718 |   |
| LPC | L22:6 [sn1]                       | 70.45   | ± | 8.94   | 105.31  | ± | 15.55  | 0.0513 |   |
| LPC | L22:6 [sn2]                       | 48.76   | ± | 6.48   | 51.86   | ± | 5.98   | 0.7439 |   |
| LPC | L26:0 [sn1]                       | 0.26    | ± | 0.04   | 0.17    | ± | 0.04   | 0.1072 |   |
| LPC | L26:0 [sn2]                       | 0.04    | ± | 0.01   | 0.04    | ± | 0.01   | 0.9462 |   |
| LPC | O-16:0                            | 2.82    | ± | 0.29   | 15.35   | ± | 2.61   | 0.0000 | * |
| LPC | O-18:0                            | 0.96    | ± | 0.10   | 4.19    | ± | 0.73   | 0.0000 | * |
| LPC | O-18:1                            | 2.93    | ± | 0.28   | 17.33   | ± | 3.18   | 0.0000 | * |
| LPC | O-20:0                            | 0.35    | ± | 0.04   | 0.88    | ± | 0.14   | 0.0003 | * |
| LPC | O-22:0                            | 0.19    | ± | 0.02   | 0.41    | ± | 0.08   | 0.0039 | * |
| LPC | O-24:0                            | 0.15    | ± | 0.01   | 0.29    | ± | 0.05   | 0.0071 | * |
| LPC | O-24:1                            | 0.09    | ± | 0.01   | 0.20    | ± | 0.04   | 0.0048 | * |
| LPC | O-24:2                            | 0.02    | ± | 0.00   | 0.07    | ± | 0.01   | 0.0002 | * |
| LPC | P-16:0                            | 2.90    | ± | 0.28   | 4.79    | ± | 0.72   | 0.0116 | * |
| LPC | P-18:0                            | 0.28    | ± | 0.02   | 0.53    | ± | 0.08   | 0.0038 | * |
| LPC | P-18:1                            | 0.54    | ± | 0.05   | 0.83    | ± | 0.09   | 0.0069 | * |
| LPC | P-20:0                            | 0.04    | ± | 0.01   | 0.17    | ± | 0.04   | 0.0004 | * |
| PE  | 15-MHDA_20:4                      | 2.52    | ± | 0.31   | 6.54    | ± | 1.23   | 0.0014 | * |
| PE  | 15-MHDA_22:6                      | 23.86   | ± | 2.74   | 31.55   | ± | 4.48   | 0.1374 |   |
| PE  | 16:0_16:1                         | 45.88   | ± | 5.25   | 56.11   | ± | 6.69   | 0.2408 |   |
| PE  | 16:0_18:1                         | 136.44  | ± | 16.15  | 457.06  | ± | 100.05 | 0.0011 | * |
| PE  | 16:0_18:2                         | 333.96  | ± | 38.23  | 611.08  | ± | 85.49  | 0.0038 | * |
| PE  | 16:0_20:3                         | 87.25   | ± | 9.73   | 170.14  | ± | 31.20  | 0.0081 | * |
| PE  | 16:0_20:4                         | 603.67  | ± | 57.81  | 638.70  | ± | 64.17  | 0.6959 |   |
| PE  | 16:0_22:6                         | 4756.19 | ± | 443.72 | 3832.30 | ± | 357.30 | 0.1531 |   |
| PE  | 17:0_20:4                         | 4.93    | ± | 0.60   | 10.76   | ± | 1.72   | 0.0016 | * |
| PE  | 17:0_22:6                         | 22.76   | ± | 2.52   | 23.54   | ± | 2.74   | 0.8405 |   |
| PE  | 18:0_18:1                         | 120.02  | ± | 14.73  | 628.25  | ± | 120.61 | 0.0001 | * |
| PE  | 18:0_18:2                         | 587.01  | ± | 74.57  | 1270.34 | ± | 297.44 | 0.0158 | * |
| PE  | 18:0_20:3                         | 60.53   | ± | 6.30   | 138.63  | ± | 27.44  | 0.0037 | * |
| PE  | 18:0_20:4                         | 1376.72 | ± | 161.75 | 2173.96 | ± | 378.65 | 0.0422 | * |
| PE  | 18:0_22:4                         | 141.91  | ± | 18.14  | 448.75  | ± | 77.60  | 0.0002 | * |
| PE  | 18:0_22:5 (n3)                    | 288.23  | ± | 33.30  | 483.02  | ± | 87.64  | 0.0283 | * |
| PE  | 18:0_22:5 (n6)                    | 394.57  | ± | 66.04  | 326.42  | ± | 53.71  | 0.4702 |   |
| PE  | 18:0_22:6                         | 5401.66 | ± | 625.72 | 6134.23 | ± | 984.70 | 0.5167 |   |
| PE  | 18:1_18:1                         | 86.69   | ± | 9.50   | 388.14  | ± | 89.49  | 0.0006 | * |
| PE  | 18:1_18:2                         | 219.30  | ± | 24.90  | 690.51  | ± | 137.64 | 0.0007 | * |



|     |                  |         |   |        |         |   |        |        |   |
|-----|------------------|---------|---|--------|---------|---|--------|--------|---|
| PE  | 18:1_22:6 (a)    | 1100.89 | ± | 118.07 | 1702.24 | ± | 226.62 | 0.0191 | * |
| PE  | 18:1_22:6 (b)    | 153.65  | ± | 15.85  | 214.24  | ± | 31.76  | 0.0763 |   |
| PE  | 38:5 (a)         | 757.78  | ± | 81.02  | 995.96  | ± | 117.87 | 0.1014 |   |
| PE  | 38:5 (b)         | 342.88  | ± | 42.34  | 311.23  | ± | 34.81  | 0.6005 |   |
| PE  | O-16:0/18:2      | 2.58    | ± | 0.37   | 5.93    | ± | 1.32   | 0.0097 | * |
| PE  | O-16:0/20:3      | 5.24    | ± | 0.66   | 9.43    | ± | 2.46   | 0.0656 |   |
| PE  | O-16:0/20:4      | 3.36    | ± | 0.49   | 9.79    | ± | 1.88   | 0.0009 | * |
| PE  | O-16:0/22:4      | 5.13    | ± | 0.61   | 11.28   | ± | 1.75   | 0.0012 | * |
| PE  | O-18:0/20:4      | 1.45    | ± | 0.20   | 3.10    | ± | 0.74   | 0.0203 | * |
| PE  | O-18:0/22:5 (a)  | 18.09   | ± | 2.87   | 24.69   | ± | 3.61   | 0.1671 |   |
| PE  | O-18:0/22:6      | 23.16   | ± | 2.65   | 29.52   | ± | 4.10   | 0.1879 |   |
| PE  | O-18:1/18:2      | 17.12   | ± | 1.97   | 50.54   | ± | 27.34  | 0.1485 |   |
| PE  | O-18:1/22:6      | 17.06   | ± | 1.81   | 26.46   | ± | 3.96   | 0.0266 | * |
| PE  | O-34:1           | 16.16   | ± | 1.64   | 36.45   | ± | 6.87   | 0.0029 | * |
| PE  | O-36:5           | 1.79    | ± | 0.34   | 4.61    | ± | 0.87   | 0.0028 | * |
| PE  | O-36:6           | 1.45    | ± | 0.30   | 4.34    | ± | 1.03   | 0.0049 | * |
| PE  | O-38:5           | 40.65   | ± | 4.88   | 58.87   | ± | 8.81   | 0.0660 |   |
| PE  | O-38:6 (a)       | 49.87   | ± | 6.20   | 61.87   | ± | 7.43   | 0.2330 |   |
| PE  | O-38:6 (b)       | 75.30   | ± | 8.77   | 122.24  | ± | 17.33  | 0.0160 | * |
| PE  | P-16:0/18:1      | 81.14   | ± | 8.81   | 290.02  | ± | 81.36  | 0.0056 | * |
| PE  | P-16:0/18:2      | 50.74   | ± | 5.63   | 121.41  | ± | 23.00  | 0.0022 | * |
| PE  | P-16:0/18:3      | 2.94    | ± | 0.40   | 10.22   | ± | 2.44   | 0.0020 | * |
| PE  | P-16:0/20:3      | 11.72   | ± | 1.38   | 29.31   | ± | 6.32   | 0.0042 | * |
| PE  | P-16:0/20:4      | 262.54  | ± | 32.42  | 940.48  | ± | 182.04 | 0.0003 | * |
| PE  | P-16:0/20:5      | 14.74   | ± | 1.92   | 42.47   | ± | 8.87   | 0.0017 | * |
| PE  | P-16:0/22:4      | 117.79  | ± | 14.17  | 315.17  | ± | 53.50  | 0.0005 | * |
| PE  | P-16:0/22:5 (n3) | 782.07  | ± | 90.77  | 1020.97 | ± | 138.33 | 0.1481 |   |
| PE  | P-16:0/22:5 (n6) | 147.79  | ± | 24.64  | 133.58  | ± | 14.66  | 0.6688 |   |
| PE  | P-16:0/22:6      | 3362.57 | ± | 371.37 | 3895.09 | ± | 348.76 | 0.3355 |   |
| PE  | P-18:0/18:1      | 133.49  | ± | 16.47  | 311.34  | ± | 171.96 | 0.2199 |   |
| PE  | P-18:0/18:2      | 46.55   | ± | 5.43   | 75.58   | ± | 14.15  | 0.0415 | * |
| PE  | P-18:0/18:3      | 2.18    | ± | 0.34   | 3.37    | ± | 0.69   | 0.1052 |   |
| PE  | P-18:0/20:3      | 10.59   | ± | 1.12   | 19.89   | ± | 4.99   | 0.0421 | * |
| PE  | P-18:0/20:4      | 170.20  | ± | 18.35  | 477.75  | ± | 80.77  | 0.0003 | * |
| PE  | P-18:0/20:5      | 10.08   | ± | 1.55   | 18.98   | ± | 3.89   | 0.0261 | * |
| PE  | P-18:0/22:4      | 62.78   | ± | 7.29   | 142.75  | ± | 26.76  | 0.0030 | * |
| PE  | P-18:0/22:5 (n3) | 262.17  | ± | 26.36  | 265.61  | ± | 27.48  | 0.9314 |   |
| PE  | P-18:0/22:5 (n6) | 84.84   | ± | 12.13  | 57.32   | ± | 7.55   | 0.1060 |   |
| PE  | P-18:0/22:6      | 1079.58 | ± | 121.54 | 1170.48 | ± | 116.38 | 0.6139 |   |
| PE  | P-18:1/18:1      | 146.37  | ± | 18.88  | 433.85  | ± | 237.83 | 0.1534 |   |
| PE  | P-18:1/18:2 (a)  | 47.88   | ± | 5.89   | 107.97  | ± | 23.03  | 0.0074 | * |
| PE  | P-18:1/18:2 (b)  | 3.60    | ± | 0.53   | 5.81    | ± | 1.46   | 0.1180 |   |
| PE  | P-18:1/20:3      | 3.76    | ± | 0.41   | 10.05   | ± | 2.34   | 0.0047 | * |
| PE  | P-18:1/20:4 (a)  | 135.89  | ± | 15.79  | 427.00  | ± | 74.19  | 0.0002 | * |
| PE  | P-18:1/20:4 (b)  | 17.56   | ± | 2.12   | 46.13   | ± | 7.63   | 0.0005 | * |
| PE  | P-18:1/20:5 (a)  | 5.38    | ± | 0.64   | 15.59   | ± | 2.92   | 0.0006 | * |
| PE  | P-18:1/20:5 (b)  | 1.03    | ± | 0.12   | 2.41    | ± | 0.58   | 0.0115 | * |
| PE  | P-18:1/22:4      | 28.59   | ± | 4.40   | 97.33   | ± | 20.02  | 0.0008 | * |
| PE  | P-18:1/22:5 (a)  | 197.71  | ± | 22.21  | 285.25  | ± | 38.36  | 0.0483 | * |
| PE  | P-18:1/22:5 (b)  | 47.31   | ± | 5.55   | 49.28   | ± | 5.96   | 0.8166 |   |
| PE  | P-18:1/22:6 (a)  | 745.07  | ± | 88.75  | 1254.41 | ± | 152.83 | 0.0063 | * |
| PE  | P-18:1/22:6 (b)  | 97.14   | ± | 11.47  | 124.08  | ± | 15.80  | 0.1743 |   |
| PE  | P-20:0/18:1      | 4.89    | ± | 0.78   | 7.93    | ± | 2.79   | 0.2291 |   |
| PE  | P-20:0/18:2      | 3.20    | ± | 0.45   | 4.83    | ± | 1.02   | 0.1171 |   |
| PE  | P-20:0/20:4      | 10.06   | ± | 1.28   | 21.48   | ± | 4.18   | 0.0066 | * |
| PE  | P-20:0/22:6      | 31.09   | ± | 4.42   | 44.30   | ± | 7.10   | 0.1122 |   |
| PE  | P-20:1/20:4      | 1.88    | ± | 0.23   | 5.52    | ± | 0.93   | 0.0002 | * |
| PE  | P-20:1/22:6      | 8.09    | ± | 1.03   | 12.51   | ± | 1.86   | 0.0374 | * |
| LPE | 16:0 [sn1]       | 36.28   | ± | 2.93   | 69.30   | ± | 10.80  | 0.0025 | * |
| LPE | 16:0 [sn2]       | 8.80    | ± | 0.68   | 17.55   | ± | 3.20   | 0.0047 | * |
| LPE | 18:0 [sn1]       | 93.72   | ± | 8.87   | 250.22  | ± | 51.60  | 0.0019 | * |
| LPE | 18:0 [sn2]       | 13.32   | ± | 1.61   | 43.33   | ± | 9.34   | 0.0012 | * |
| LPE | 18:1 [sn1]       | 18.18   | ± | 1.81   | 67.41   | ± | 15.67  | 0.0012 | * |
| LPE | 18:1 [sn2]       | 10.61   | ± | 1.12   | 35.26   | ± | 11.76  | 0.0191 | * |
| LPE | 18:2 [sn1]       | 10.38   | ± | 0.97   | 30.99   | ± | 8.32   | 0.0072 | * |
| LPE | 18:2 [sn2]       | 9.92    | ± | 1.13   | 25.20   | ± | 5.44   | 0.0038 | * |

|     |                |         |   |        |         |   |        |        |   |
|-----|----------------|---------|---|--------|---------|---|--------|--------|---|
| LPE | 20:4 [sn1]     | 8.71    | ± | 1.03   | 24.22   | ± | 4.62   | 0.0009 | * |
| LPE | 20:4 [sn2]     | 12.69   | ± | 1.00   | 27.06   | ± | 5.48   | 0.0057 | * |
| LPE | 22:6 [sn1]     | 90.49   | ± | 7.29   | 144.05  | ± | 22.16  | 0.0153 | * |
| LPE | 22:6 [sn2]     | 131.22  | ± | 9.23   | 158.49  | ± | 23.65  | 0.2351 |   |
| LPE | P-16:0         | 30.21   | ± | 2.84   | 77.40   | ± | 11.64  | 0.0002 | * |
| LPE | P-18:0         | 14.57   | ± | 1.28   | 32.05   | ± | 5.86   | 0.0025 | * |
| LPE | P-18:1         | 13.63   | ± | 1.28   | 33.53   | ± | 6.23   | 0.0014 | * |
| LPE | P-20:0         | 0.41    | ± | 0.07   | 1.48    | ± | 0.40   | 0.0046 | * |
| PI  | 16:0_16:1      | 19.03   | ± | 2.21   | 21.16   | ± | 2.00   | 0.5089 |   |
| PI  | 16:0_20:4      | 203.03  | ± | 18.99  | 326.57  | ± | 38.44  | 0.0052 | * |
| PI  | 16:0/16:0      | 40.94   | ± | 6.22   | 48.86   | ± | 10.17  | 0.4901 |   |
| PI  | 16:0/20:3 (a)  | 45.35   | ± | 4.75   | 65.71   | ± | 7.80   | 0.0293 | * |
| PI  | 16:0/20:3 (b)  | 8.74    | ± | 0.94   | 14.08   | ± | 2.23   | 0.0224 | * |
| PI  | 18:0_18:1      | 109.24  | ± | 13.80  | 337.99  | ± | 71.23  | 0.0012 | * |
| PI  | 18:0_20:3 (a)  | 1178.70 | ± | 109.32 | 1173.33 | ± | 106.13 | 0.9736 |   |
| PI  | 18:0_20:3 (b)  | 115.83  | ± | 11.71  | 134.60  | ± | 14.10  | 0.3213 |   |
| PI  | 18:0_20:4      | 5894.63 | ± | 563.59 | 6537.79 | ± | 596.45 | 0.4570 |   |
| PI  | 18:0_22:5 (n3) | 729.59  | ± | 65.38  | 645.02  | ± | 38.81  | 0.3420 |   |
| PI  | 18:0_22:5 (n6) | 71.09   | ± | 8.46   | 44.49   | ± | 5.11   | 0.0294 | * |
| PI  | 18:0_22:6      | 601.06  | ± | 56.48  | 502.52  | ± | 48.10  | 0.2330 |   |
| PI  | 18:0/20:2      | 12.73   | ± | 1.64   | 24.49   | ± | 4.80   | 0.0148 | * |
| PI  | 18:1/18:2      | 71.44   | ± | 7.76   | 155.44  | ± | 22.70  | 0.0007 | * |
| PI  | 34:0           | 117.45  | ± | 20.12  | 159.49  | ± | 49.76  | 0.3843 |   |
| PI  | 34:1           | 135.85  | ± | 16.97  | 206.87  | ± | 29.31  | 0.0373 | * |
| PI  | 36:2 (a+b)     | 292.46  | ± | 34.60  | 558.23  | ± | 116.57 | 0.0190 | * |
| PI  | 38:5 (a)       | 386.32  | ± | 32.52  | 518.26  | ± | 39.71  | 0.0193 | * |
| PI  | 38:5 (b)       | 79.74   | ± | 7.60   | 101.30  | ± | 8.98   | 0.0857 |   |
| PI  | 38:6           | 74.63   | ± | 5.78   | 78.03   | ± | 5.99   | 0.6983 |   |
| PI  | 40:4           | 73.83   | ± | 8.10   | 122.70  | ± | 18.33  | 0.0134 | * |
| LPI | 18:0 [sn1]     | 58.77   | ± | 5.46   | 120.15  | ± | 21.01  | 0.0034 | * |
| LPI | 18:0 [sn2]     | 3.87    | ± | 0.74   | 8.09    | ± | 1.09   | 0.0038 | * |
| LPI | 18:1 [sn1]     | 4.55    | ± | 0.52   | 15.92   | ± | 2.61   | 0.0001 | * |
| LPI | 18:1 [sn2]     | 1.13    | ± | 0.22   | 3.01    | ± | 0.44   | 0.0005 | * |
| LPI | 18:2 [sn1]     | 2.15    | ± | 0.39   | 8.02    | ± | 2.04   | 0.0029 | * |
| LPI | 18:2 [sn2]     | 1.71    | ± | 0.26   | 4.40    | ± | 0.88   | 0.0027 | * |
| LPI | 20:4 [sn1]     | 25.60   | ± | 2.74   | 52.33   | ± | 5.56   | 0.0002 | * |
| LPI | 20:4 [sn2]     | 20.89   | ± | 2.84   | 29.99   | ± | 3.61   | 0.0614 |   |
| PS  | 36:1           | 330.00  | ± | 38.73  | 970.02  | ± | 294.05 | 0.0163 | * |
| PS  | 38:4           | 383.51  | ± | 44.18  | 997.14  | ± | 127.93 | 0.0001 | * |
| PS  | 40:5           | 765.53  | ± | 60.78  | 1252.20 | ± | 124.15 | 0.0011 | * |
| PS  | 40:6           | 2507.82 | ± | 193.28 | 2483.56 | ± | 153.08 | 0.9291 |   |
